# Supplementary material
Source: publisher figshare collection journal article supplement (https://acs.figshare.com/ndownloader/files/24026294)

## Supporting Information

### Amino-Functionalized Porphyrin-based Porous Organic Polymers for CO<sub>2</sub> Capture and Hg<sup>2+</sup> Removal

Guo Jiangfei †, Wang Lizhi †, Du Zhang, and Jianhan Huang \*

*College of Chemistry and Chemical Engineering, Hunan Provincial Key Laboratory of Micro & Nano Materials Interface Science, Central South University, Changsha 410083, China*

---

† These two authors contributed this work equally.

\*Corresponding author. E-mail address: [jianhanhuang@csu.edu.cn](mailto:jianhanhuang@csu.edu.cn)

## **1. EXPERIMENTAL SECTION**

### **1.1. Chemicals and reagents.**

Benzaldehyde was purchased from Sinopharm Chemical Reagent Co. Ltd. Pyrrole was provided from Aladdin Chemical Reagent Co. Ltd. Trimesoyl chloride (TMC), Melamine (MA),  $\text{Cd}(\text{NO}_3)_2 \cdot 3\text{H}_2\text{O}$ ,  $\text{MnCl}_2 \cdot 3\text{H}_2\text{O}$ ,  $\text{Pb}(\text{NO}_3)_3$ , anhydrous  $\text{CaCl}_2$ ,  $\text{Cu}(\text{NO}_3)_2 \cdot 3\text{H}_2\text{O}$ ,  $\text{ZnCl}_2$ , anhydrous  $\text{MgCl}_2$  and anhydrous  $\text{FeCl}_3$  were supplied by Aladdin Reagent Co. Ltd. (Shanghai). 1,2-dichloroethane (DCE), chloroform, methanol, ethanol, and Dimethyl sulfoxide (DMSO) was purchased from Xilong Chemicals.  $\text{HgCl}_2$  was received from Sinopharm Chemical Reagent Co. Ltd. The standard aqueous solution of the nine metal ions with the concentration of  $1000 \text{ mg} \cdot \text{L}^{-1}$  was purchased from National Analysis Center for Iron & Steel (Beijing, China). All these reagents were analytical agents and used without further purification.

### **1.2. Synthesis of 5,10,15,20-tetraphenylporphyrin.**

Propionic acid (100 ml) was joined in a flask-3-neck, slowly heated up to  $140^\circ\text{C}$  and kept the temperature about 10 min. Benzaldehyde benzaldehyde (0.03 mol) and steamed pyrrole (0.03 mol) had slowly added to the reaction flask, maintain  $146^\circ\text{C}$  keeping 1.5 h. After cooling to room temperature, adding suitable amount of methanol let stand up for the night. The crystal products was filtered by recrystallization of chloroform and methanol, purified with methanol and water sufficiently and dried for 24 h under a vacuum for 24 hours.

### **1.3. Preparation of HTM.**

The precursor HTM is obtained by the Friedel-Craft acylation reaction. Typically, TPP (1.5 mmol), TMC (4 mmol), and anhydrous  $\text{AlCl}_3$  (24 mmol) were joined to dissolve in 50 mL DCE under the  $\text{N}_2$  atmosphere. The mixture was stirred and reacted

at 90 °C for 24 h. The products were obtained by filtration and washed with DCE, ethanol, HCl/H<sub>2</sub>O as well as hot water. The product was further purified in the Soxhlet extractor with ethanol for 24 h and dried under vacuum at 60°C for 24 h.

#### **1.4 Preparation of HTM -MA.**

HTM-MA was synthesized by Schiff base reaction. Typically, 0.25 g HTM was dispersed in 50 mL DMSO and 0.75 g MA was dissolved in above DMSO. The reaction mixture was stirred and heated to 160 °C for 72 h under N<sub>2</sub> atmosphere. The product was washed with DMSO, methanol as well as hot water and further purified in a Soxhlet extractor with methanol for 24 h. Finally, the product was collected after dried under vacuum at 60°C for 24 h.

#### **1.5 Characterization**

The Fourier transform infrared (FT-IR) spectra of the polymers were detected by a Nicolet 6700 Fourier transform infrared spectrophotometer (Thermo Scientific Co., United States). Micromeritics ASAP 2020 surface area (Micromeritics, USA) was used to conduct the pore structure and BET surface area of the polymers. CHNOS elemental (Vario Micro Cube, Germany) was used to examine the elemental analysis (EA). The X-ray photoelectron spectroscopy (XPS) characterization was investigated via Thermo ESCALAB spectrometer with an Al K- $\alpha$  source. Field emission scanning electron microscope (FESEM, Nova Nano SEM 230) operating was used to detect the morphology of the polymers. High-resolution transmission electron microscopy (HRTEM) was characterized on an FEI Titan G2 60-300 microscope. The thermogravimetric analysis (TGA) of the polymers was exhibited by thermobalance (STA-499C, NETZSCH). The metal ions concentration was displayed applying TAS-990 atomic absorption spectrum (AAS).

#### **1.6 Hg<sup>2+</sup> adsorption**

The equilibrium adsorption of  $\text{Hg}^{2+}$  on the polymers was performed by mixing 0.02 g of the polymers with 50 mL of  $\text{Hg}^{2+}$  aqueous solution, the initial concentration ranges of  $\text{Hg}^{2+}$  varied from 100 to 500 mg/L. The adsorption was performed at 298 K with 2 h to make the adsorption reach equilibrium. The residual concentrations of  $\text{Hg}^{2+}$  were diluted to an appropriate concentration and determined by AAS. The equilibrium capacity was calculated as follows,

$$q_e = (C_0 - C_e)V/W$$

where  $q_e$  (mg/g) is the equilibrium capacity after the  $\text{Hg}^{2+}$  adsorption,  $C_0$  (mg/L) and  $C_e$  (mg/L) represent the initial and equilibrium concentration of  $\text{Hg}^{2+}$ , respectively.  $V$  is the volume of the total adsorption aqueous solution (L) and  $W$  is the mass of the polymers (mg).

Table S1 Elemental analysis of the polymers from XPS

| Sample | C1s (%) | N1s (%) | O1s (%) |
|--------|---------|---------|---------|
| HTM    | 88.16   | 1.39    | 12.45   |
| HTM-MA | 54.57   | 42.08   | 3.35    |

Table S2 Textual properties and the CO<sub>2</sub> uptake of various adsorbents

| Samples      | BET<br>(m <sup>2</sup> ·g <sup>-1</sup> ) | CO <sub>2</sub> Uptake |       | Q <sub>st</sub> | Selectivity            |           | Ref. |
|--------------|-------------------------------------------|------------------------|-------|-----------------|------------------------|-----------|------|
|              |                                           | (mg·g <sup>-1</sup> )  |       |                 | (S <sub>CO2/N2</sub> ) |           |      |
|              |                                           | 273 K                  | 298 K |                 |                        | IAST      |      |
| NOP-52@COOH  | 738                                       | 159                    | 81    | 34.5            | 57                     | 25        |      |
| CBAP-2       | 726                                       | 141.9                  | 97.9  | 33.6            | 15.4                   | 26        |      |
| CBAP-2 (EDA) | 228                                       | 124.0                  | 86.3  | 46.4            | 87.8                   | 26        |      |
| CAP-DAP      | 517                                       | 153.2                  | 99.5  | 46.6            | 86.22                  | 27        |      |
| MTPA         | 481                                       | 126                    | 94    | 30.7            | 91.8                   | 37        |      |
| SNW-1        | 821                                       | /                      | 96    | 35              | 50                     | 40        |      |
| DMP-II       | 106                                       | /                      | 88    | 28              | 35                     | 41        |      |
| TH-COF-1     | 684                                       | 128                    | 97    | 31              | 19                     | 42        |      |
| NAN-2        | 56                                        | 65.6                   | 39.6  | 31.5            | 72.7                   | 43        |      |
| COP-98A      | 88                                        | 115                    | 99.2  | /               | /                      | 44        |      |
| HTM-MA       | 587                                       | 172                    | 120   | 31.3            | 58.4                   | This work |      |

Table S3 Comparison of The Hg<sup>2+</sup> adsorption with various adsorbents.

| Samples                                 | q <sub>max</sub> /(mg/g) | Ref       |
|-----------------------------------------|--------------------------|-----------|
| ZIF-90-SH                               | 22.4                     | 47        |
| NOM                                     | 230                      | 35        |
| thiol-functionalized mesoporous silica  | 401                      | 48        |
| ACOF                                    | 175                      | 49        |
| SMP                                     | 595                      | 3         |
| PAF-1-SH                                | 1000                     | 50        |
| sulfur-functionalized mesoporous carbon | 435                      | 51        |
| CBAP-1 (AET)                            | 232                      | 28        |
| TAPB-BMTTPA-COF                         | 734                      | 52        |
| COF-LZU8                                | 236                      | 29        |
| HTM-MA                                  | 328                      | This work |

Table S4 Correlative parameters of the kinetic data, Langmuir model and Freundlich models for Hg<sup>2+</sup> adsorption on HTM-MA

|                     | parameters                                   | HTM   | HTM-MA |
|---------------------|----------------------------------------------|-------|--------|
|                     | $q_m /(\text{mg/g})$                         | 271.6 | 328.1  |
| Langmuir model      | $K_L /(\text{L/mg})$                         | 0.003 | 0.024  |
|                     | $R^2$                                        | 0.971 | 0.993  |
|                     | $K_F /((\text{mg/g})(\text{L/mg})^{1/n})$    | 5.0   | 60.1   |
| Freundlich model    | $n$                                          | 1.7   | 3.6    |
|                     | $R^2$                                        | 0.988 | 0.996  |
| Pseudo-first-order  | $k_1 /(\text{min}^{-1})$                     | /     | 0.5239 |
|                     | $R^2$                                        | /     | 0.958  |
| Pseudo-second-order | $k_2 /(\text{g}/(\text{mg}\cdot\text{min}))$ | /     | 0.0031 |
|                     | $R^2$                                        | /     | 0.990  |



Figure S1  $^1\text{H}$  NMR spectrum of 5,10,15,20-tetraphenylporphyrin

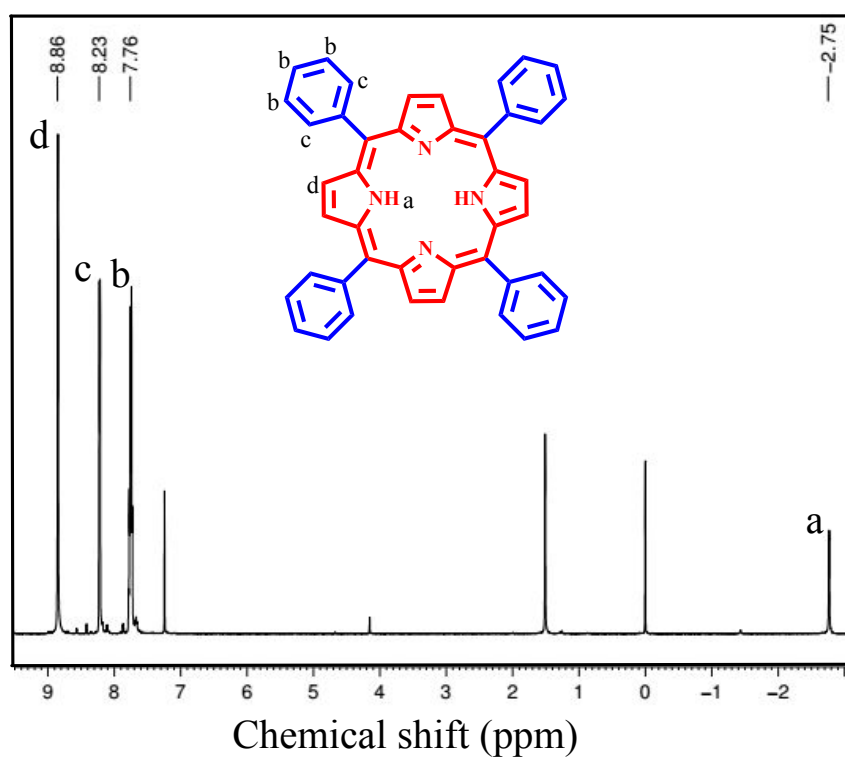

Figure S2 (a) survey and (b) O1s of the polymers

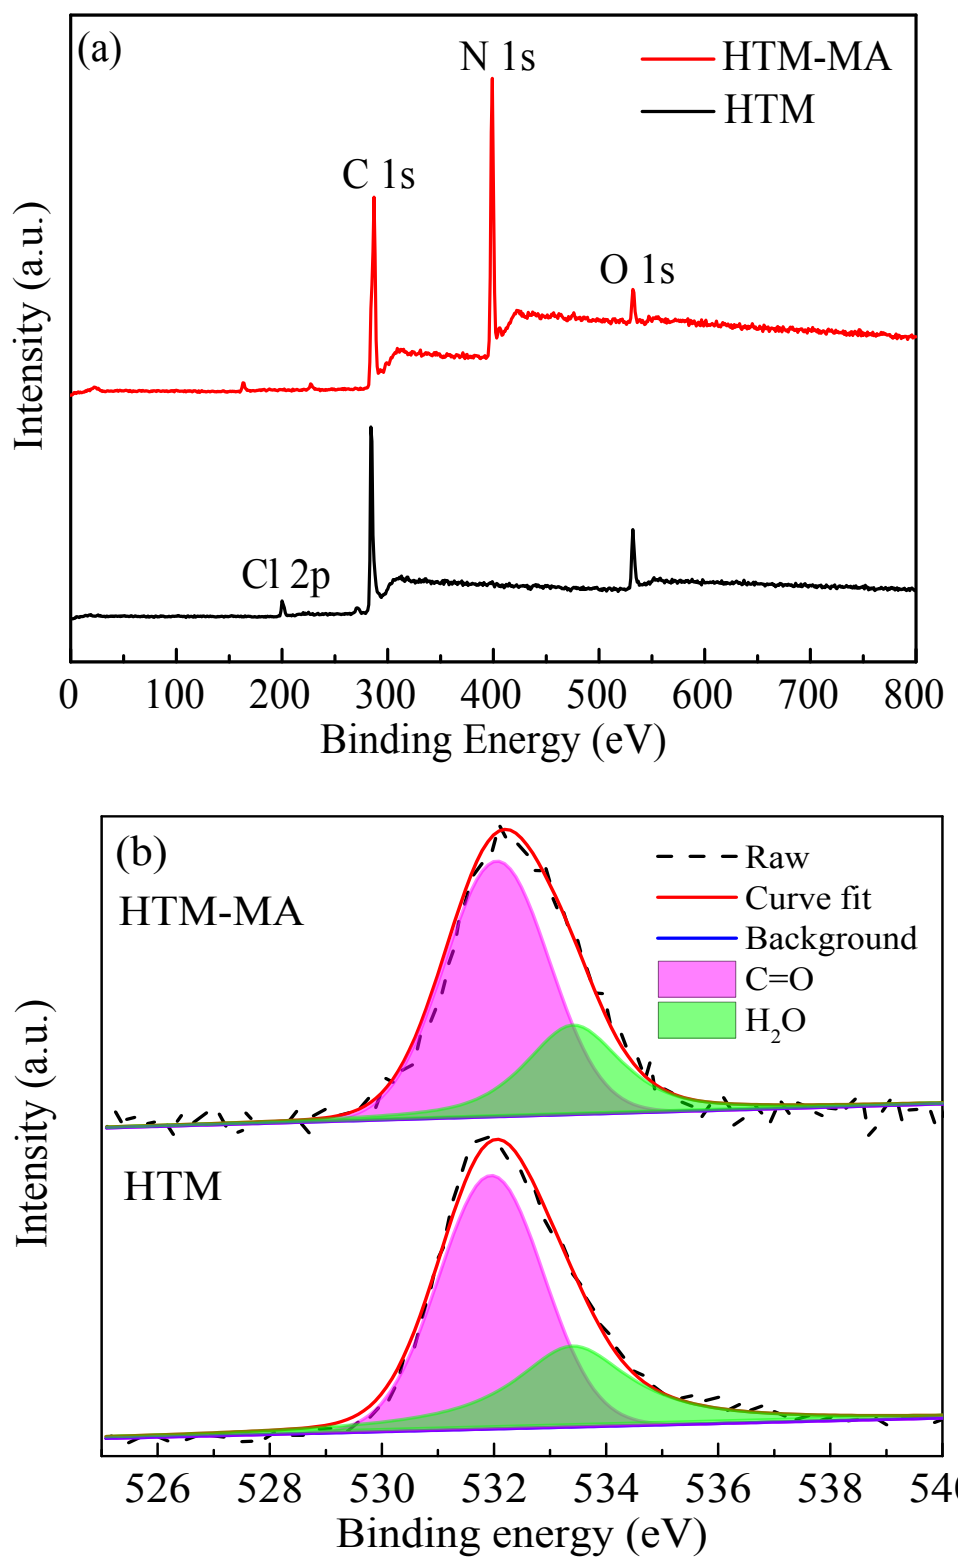

Figure S3 TG curves of polymers HTM (red) and HTM-MA (black) in a nitrogen atmosphere

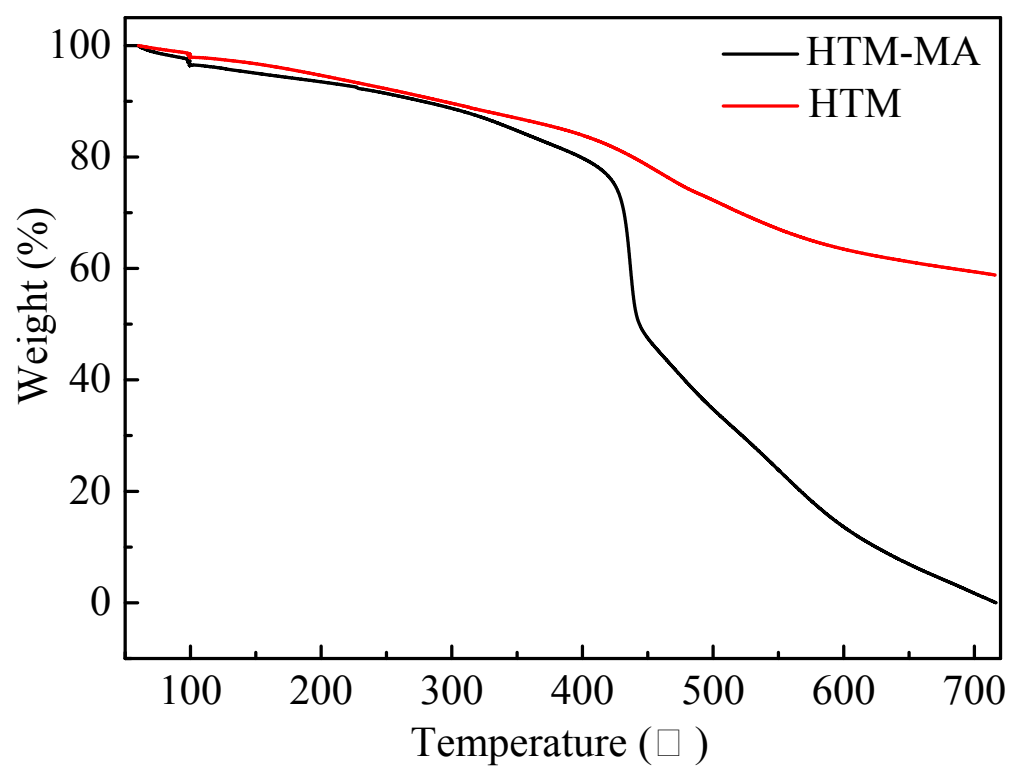

Figure S4 XRD patterns of the polymers.

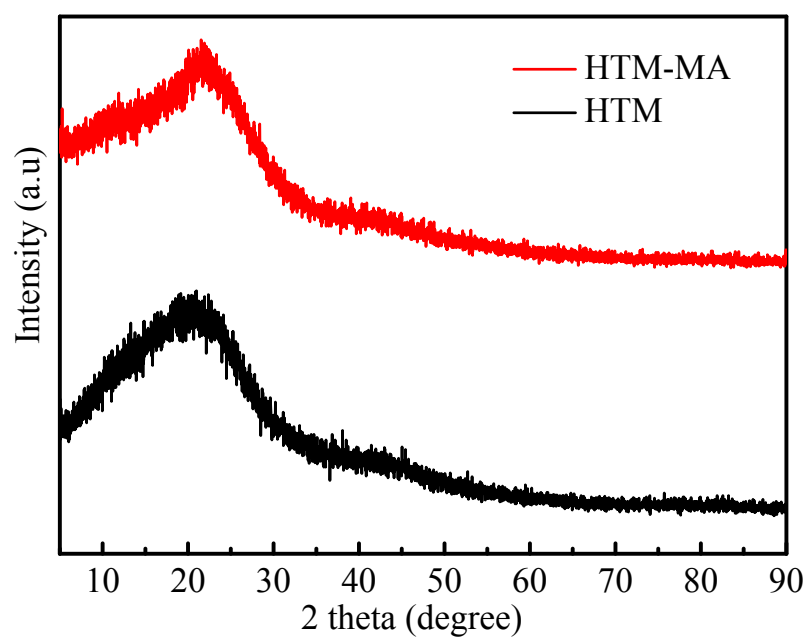

Figure S5 CO<sub>2</sub> adsorption-desorption isotherms (a) and PSD (b) of the polymers (HTM-MA: red lines and symbols; HTM: black lines and symbols).

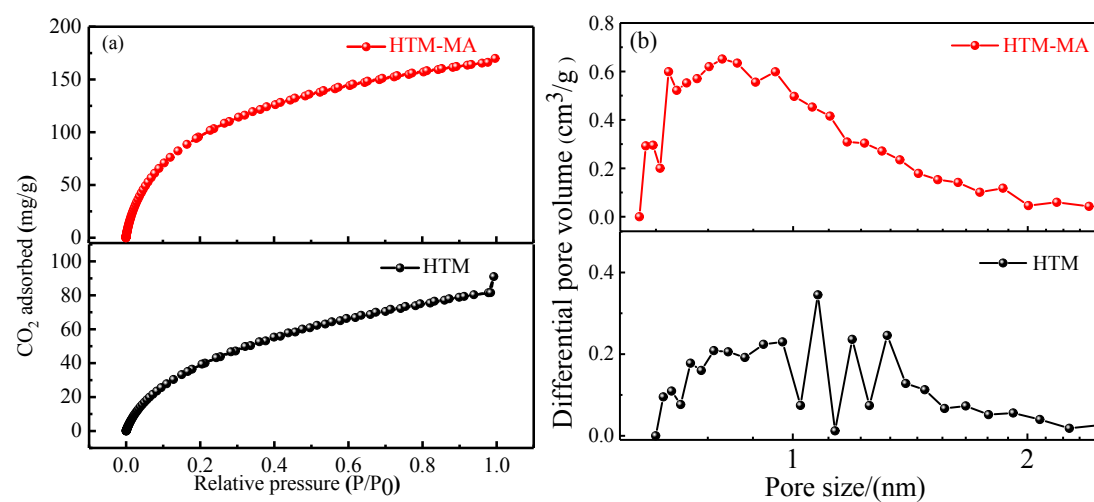

Figure S6 N<sub>2</sub> isotherms of the polymers

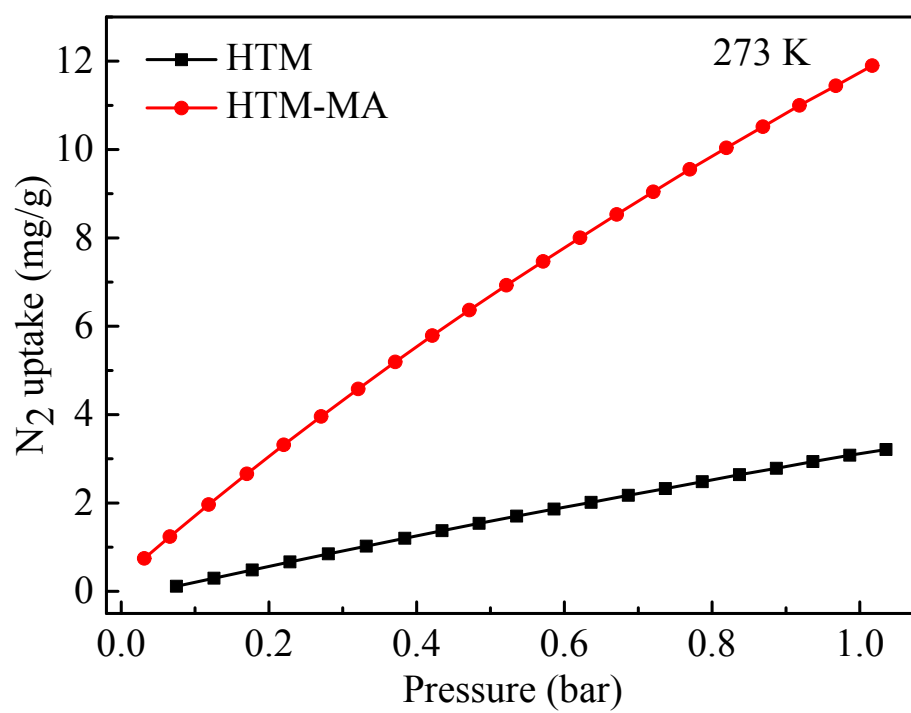

Figure S7 Fitting results of the kinetic adsorption of  $\text{Hg}^{2+}$  on HTM-MA

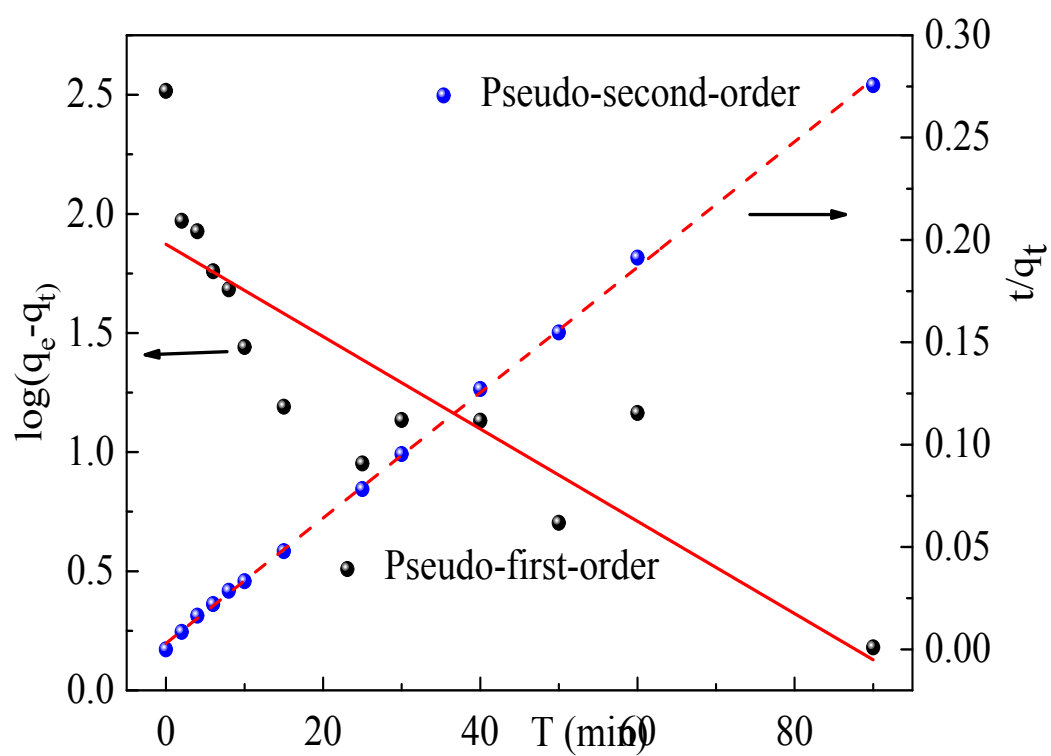

Scheme S1 Illustration of the possible chelating interaction between  $\text{Hg}^{2+}$  and HTM-MA

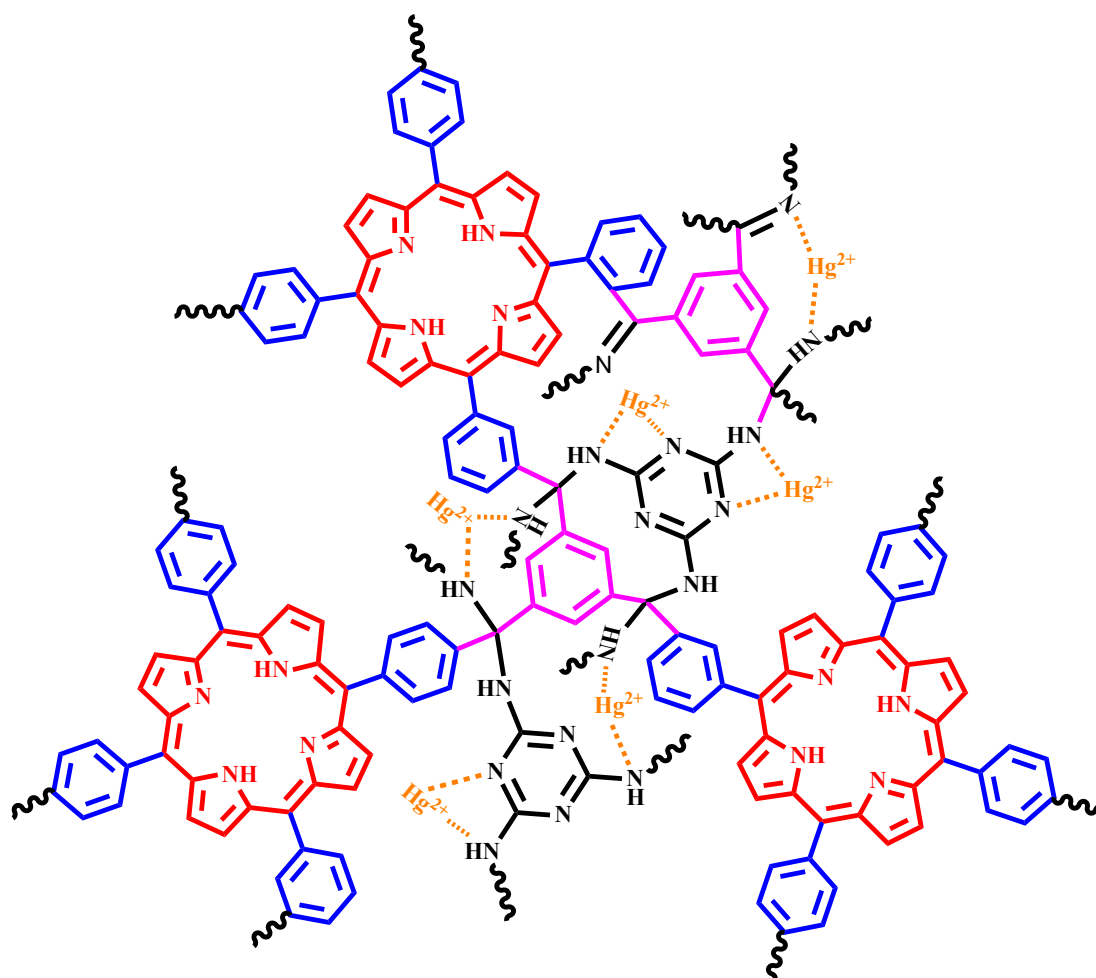

Supplement: Supplementary file 1 [file 24026294]
